# Supplementary material for: Anxiety during Radiation Therapy: A Prospective Randomized Controlled Trial Evaluating a Specific One-on-One Procedure Announcement Provided by a Radiation Therapist
Source: MDPI journal article supplement (doi:10.3390/cancers13112572), 2021-05-24
Supplement: s1 [file s1]

**Table S1.** Institutional inventory. The institutional inventory was composed of 43 questions. There were three possible answers: yes/no/do not know (Table S1). It was completed at the end of the radiation treatment.

- 1) Did you receive a booklet about radiation therapy?
- 2) Who gave it to you? radiation oncologist, resident, radiation therapist, other (precise)
- 3) Did you consult the welcome booklet of the cancer center?
- 4) If yes, did you read it alone?
- 5) Or with someone?
- 6) Did you consult the specific area information of the cancer center?
- 7) Did you consult the Internet?
- 8) Did you discuss your disease with other patients?
- 9) Did you discuss the radiation treatment with your house doctor?
- 10) Did you discuss radiation treatment with another healthcare professional?
- 11) Did you know that you would undergo a CT scan before radiation therapy?
- 12) Who informed you about this point? radiation oncologist, resident, radiation therapist, other (be precise)
- 13) Did anyone talk you about treatment positioning?
- 14) Who informed you about this point? radiation oncologist, resident, radiation therapist, other (be precise)
- 15) Did anyone talk you about tatoos?
- 16) Who informed you about this point? radiation oncologist, resident, radiation therapist, other (be precise)
- 17) Did you know that you were under surveillance during radiation session?
- 18) Who informed you about this point? radiation oncologist, resident, radiation therapist, other (be precise)
- 19) Did anyone talk you about control positioning?
- 20) Who informed you about this point? radiation oncologist, resident, radiation therapist, other (be precise)
- 21) Did anyone talk you about dosimetry *in vivo*?
- 22) Who informed you about this point? radiation oncologist, resident, radiation therapist, other (be precise)
- 23) Did anyone talk you about side effects?
- 24) Who informed you about this point? radiation oncologist, resident, radiation therapist, other (be precise)
- 25) Did anyone talk you about the organization of transport?
- 26) Who informed you about this point? radiation oncologist, resident, radiation therapist, other (be precise)
- 27) Did anyone talk you about consultations during treatment?
- 28) Who informed you about this point? radiation oncologist, resident, radiation therapist, other (be precise)
- 29) Did anyone talk you about opening hours of the radiation department?
- 30) Who informed you about this point? radiation oncologist, resident, radiation therapist, other (be precise)
- 31) Did anyone talk you about the psychologist?
- 32) Who informed you about this point? radiation oncologist, resident, radiation therapist, other (be precise)
- 33) Did anyone talk to you about the pain management specialist?
- 34) Who informed you about this point? radiation oncologist, resident, radiation therapist, other (be precise)
- 35) Did anyone talk you about alternative therapy?
- 36) Did you use an alternative therapy?
- 37) In your opinion, do you think that the specific procedure announcement provided by a radiation therapist was useful?
- 38) Is there any information that you would have liked to receive and that you did not receive during this specific procedure announcement? What information?
- 39) Was there any information provided during this specific procedure announcement that you would have preferred not to know? What information?
- 40) Do you think that this specific procedure announcement should be scheduled at another time? If yes, what would be in your opinion the ideal moment?
- 41) Do you think that this specific procedure announcement should be shorter?
- 42) Do you think that the booklet about radiotherapy that you received was useful?
- 43) Do you think that other information should be in the booklet? Which?
